# Supplementary material
Source: MDPI journal article supplement (https://www.mdpi.com/2077-1312/10/8/1055)
Supplement: s1 [file s1]

---

*Supplementary material*

# **Effects of Tsunami Shelters in Pandeglang, Banten, Indonesia, Based on Agent-Based Modelling: A Case Study of the 2018 Anak Krakatoa Volcanic Tsunami**

**Han Soo Lee <sup>1,2,\*</sup>, Ricard Diago Sambuaga <sup>3</sup> and Constanza Flores <sup>1</sup>**

<sup>1</sup> Transdisciplinary Science and Engineering Program, Graduate School of Advanced Science and Engineering, Hiroshima University, 1-5-1 Kagamiyama, Higashi-Hiroshima 739-8529, Hiroshima, Japan

<sup>2</sup> Center for the Planetary Health and Innovation Science (PHIS), The IDEC Institute, Hiroshima University

<sup>3</sup> Department of Development Technology, Graduate School for International Development and Cooperation (IDEC), Hiroshima University, 1-5-1 Kagamiyama, Higashi-Hiroshima 739-8529, Hiroshima, Japan

\* Correspondence: leehs@hiroshima-u.ac.jp ; Tel.: +81-82-424-4405

**Table S1.** Historical data on tsunami disasters in Indonesia. 2018 Palau Tsunami and onwards are not considered.

| Year | Number of Events | Fatalities (person) |                    |                        | Damaged Houses (unit) |          |       | Damaged Infrastructures (unit) |                    |                        |
|------|------------------|---------------------|--------------------|------------------------|-----------------------|----------|-------|--------------------------------|--------------------|------------------------|
|      |                  | Died and Lost       | Wounds or Injuries | Suffered and Evacuated | Heavy                 | Moderate | Light | Health Facilities              | Worship Facilities | Educational Facilities |
| 2014 | 2                | 0                   | 0                  | 0                      | 0                     | 0        | 0     | 0                              | 0                  | 0                      |
| 2012 | 3                | 11                  | 9                  | 0                      | 0                     | 0        | 5     | 0                              | 0                  | 0                      |
| 2011 | 1                | 1                   | 0                  | 67                     | 17                    | 0        | 17    | 2                              | 1                  | 0                      |
| 2010 | 1                | 503                 | 498                | 15,353                 | 517                   | 0        | 204   | 5                              | 7                  | 6                      |
| 2006 | 3                | 683                 | 520                | 6727                   | 1777                  | 0        | 585   | 4                              | 22                 | 8                      |
| 2004 | 2                | 165,945             | 4,662              | 522,462                | 179,312               | 0        | 0     | 240                            | 2742               | 1226                   |
| 1998 | 6                | 0                   | 0                  | 381                    | 0                     | 0        | 0     | 0                              | 0                  | 0                      |
| 1994 | 1                | 92                  | 0                  | 0                      | 0                     | 0        | 0     | 0                              | 0                  | 0                      |
| 1992 | 1                | 2400                | 0                  | 0                      | 0                     | 0        | 0     | 0                              | 0                  | 113                    |
| 1991 | 1                | 1022                | 0                  | 0                      | 0                     | 0        | 0     | 0                              | 0                  | 0                      |
| 1979 | 1                | 539                 | 0                  | 171                    | 0                     | 0        | 0     | 0                              | 0                  | 0                      |
| 1977 | 4                | 472                 | 273                | 0                      | 0                     | 0        | 0     | 0                              | 0                  | 1                      |
| 1973 | 1                | 1500                | 0                  | 0                      | 0                     | 0        | 0     | 0                              | 0                  | 0                      |
| 1907 | 1                | 400                 | 0                  | 0                      | 0                     | 0        | 0     | 0                              | 0                  | 0                      |
| 1861 | 1                | 50                  | 0                  | 0                      | 0                     | 0        | 0     | 0                              | 0                  | 0                      |

**Table S2.** Anak Krakatoa eruption-induced tsunami timeline.

| Tsunami timeline |    |     |       |      |       |     |      |      |      |      |      |    |     |      |
|------------------|----|-----|-------|------|-------|-----|------|------|------|------|------|----|-----|------|
| Time (min)       | 32 | 34  | 36    | 39   | 45    | 47  | 49   | 51   | 52   | 53   | 55   | 56 | 58  | 60   |
| Sea Level (m)    | Up | 0.7 | −0.65 | 1.35 | −1.25 | 0.3 | 0.55 | −1.1 | −1.3 | 0.95 | 0.05 | 0  | 0.5 | −0.4 |

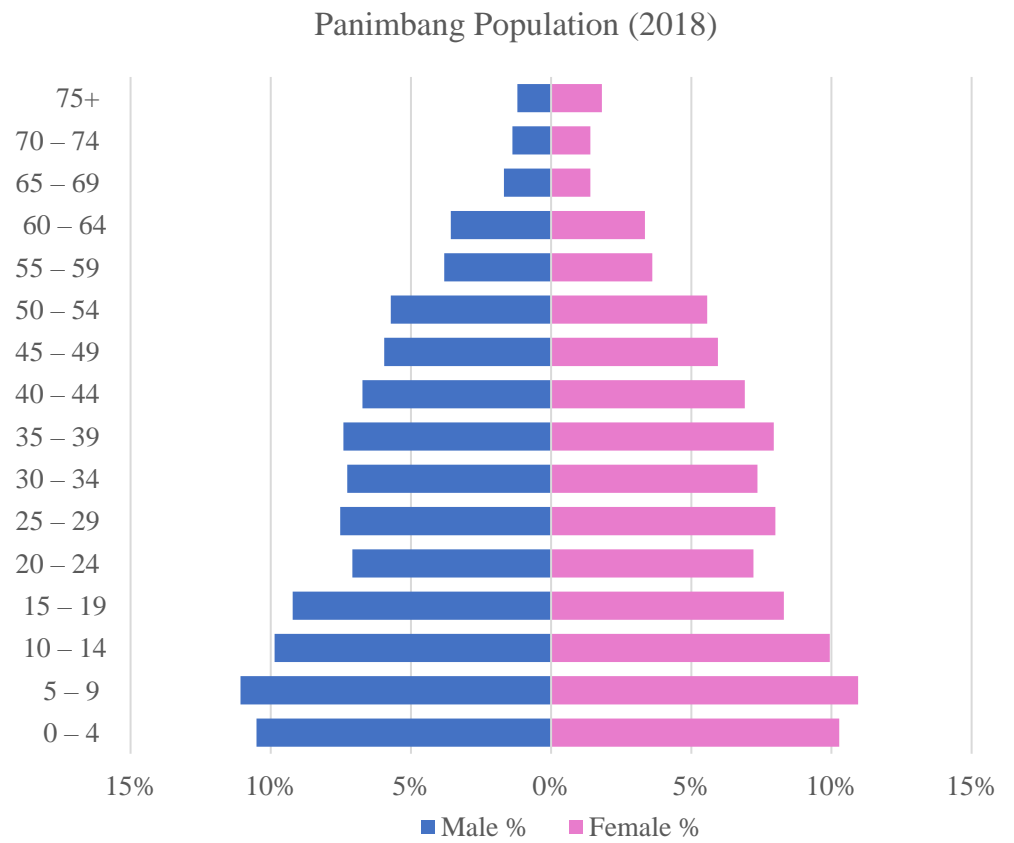

**Figure S1.** Panimbang population dataset (2018), divided by age group. (Source: ((Statistics Indonesia - Pandeglang District) BPS, 2018)).

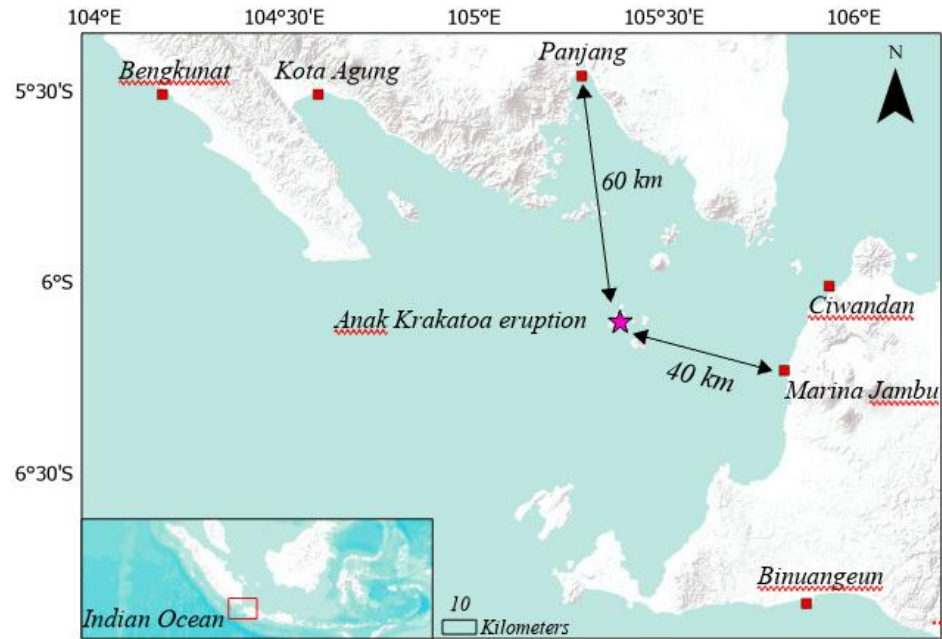

**Figure S2.** The tide gauge locations in Banten and Lampung Provinces.

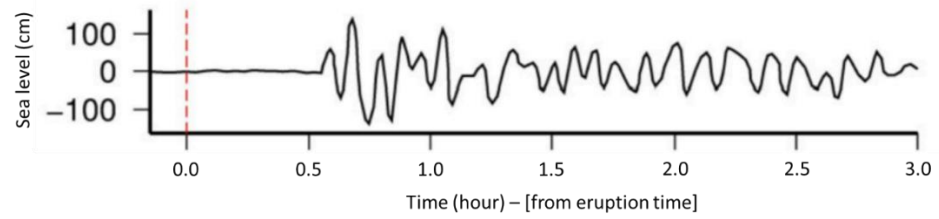

**Figure S3.** De-tided waveforms at Marina Jambu (Heidarzadeh et al., 2020).

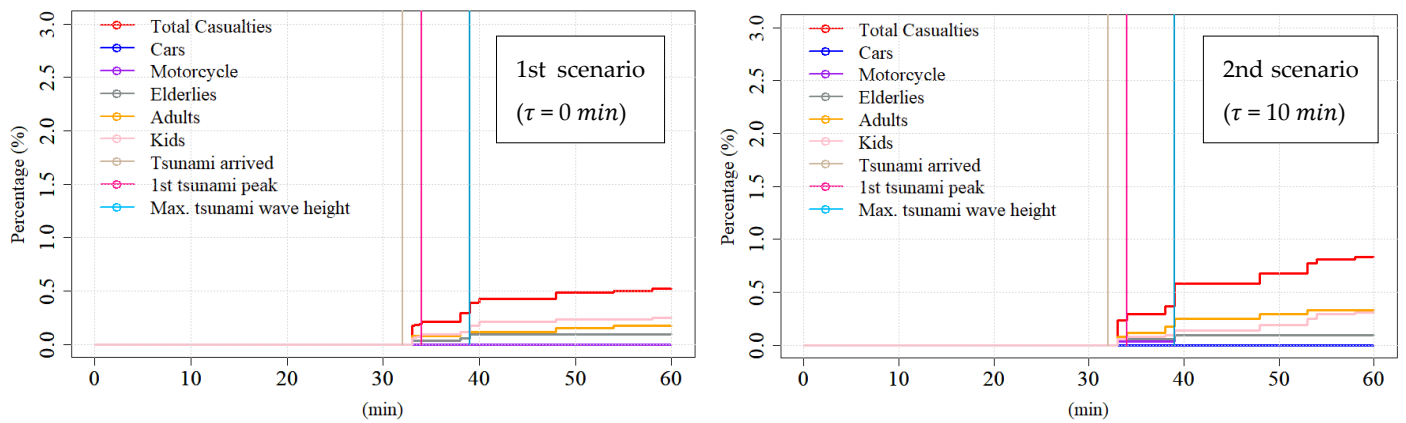

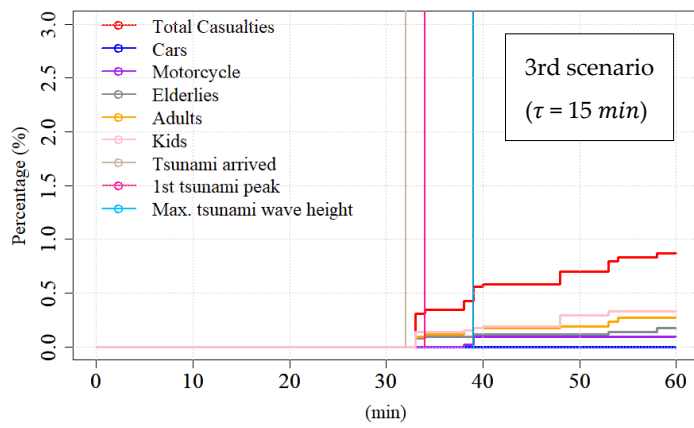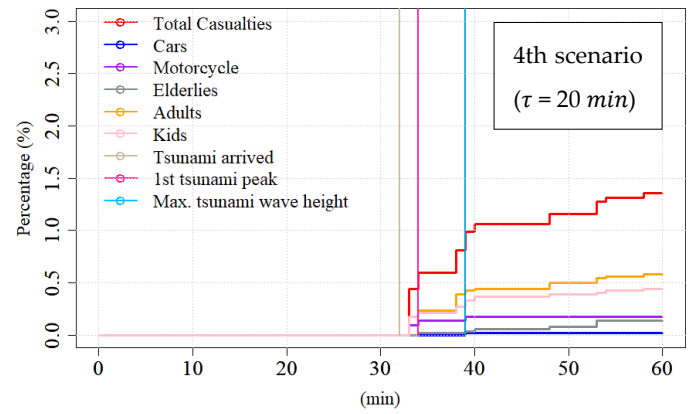

**Figure S4.** Casualty percentage in the 1st scenario ( $\tau = 0 \text{ min}$ ), the 2nd scenario ( $\tau = 10 \text{ min}$ ), the 3rd scenario ( $\tau = 15 \text{ min}$ ), and the 4th scenario ( $\tau = 20 \text{ min}$ ).
